# Supplementary material for: Exploring Patient Views and Acceptance of Multiparametric Magnetic Resonance Imaging for the Investigation of Suspected Prostate Cancer (the PACT Study): A Mixed-Methods Study Protocol
Source: MDPI journal article supplement (doi:10.3390/mps3020026), 2020-03-28
Supplement: s1 [file s1]

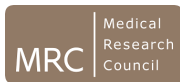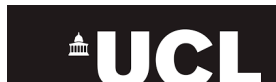

**Acceptability of Prostate MRI:**

**Patient Consent Form 1 (Questionnaire)**

*Please initial box*

1. I confirm that I have read and understood the information sheet dated ..... (version ..... ) for the above questionnaire study. I have had the opportunity to consider the information, ask questions and had these answered satisfactorily.

☐

2. I understand that my participation is voluntary and that I am free to withdraw at any time without giving any reason, without my medical care or legal rights being affected.

☐

3. I agree to my GP being informed of my participation in the study.

☐

4. I agree to take part in the above study.

☐

Name of participant:

Date:

Signature:

Name of person taking consent:

Date:

Signature:

**Acceptability of Prostate MRI:**

**Patient Information Sheet**

- In the past (1980s – 2000s) – MRI had very limited availability and was not commonly used:

- Men suspected to have prostate cancer would not normally have an MRI scan
- They would normally undergo a prostate biopsy (tissue sample) through the rectum (bottom)
- This could cause side-effects, including: pain, infection (1-3%) and bleeding

But, this technique did not detect every prostate cancer: approximately 50% could still be missed

- Furthermore, many of these men did not need a prostate biopsy in the first place

- Today – MRI is now widely available in the UK:

- We now use MRI scans to see if prostate cancer is likely to be present or not (before a biopsy is performed)
- If the MRI scan shows:
  - Suspicious areas in the prostate – then you will likely be advised to still have a prostate biopsy
  - No suspicious areas in the prostate – then you will probably not need to have biopsy
- MRI scans can now detect around 80-90% of important prostate cancers
- So, by using MRI we can prevent many men from unnecessarily having a prostate biopsy

But, MRI does not detect every prostate cancer: approximately 10-20% can still be missed by MRI

- Therefore, by using MRI, we could miss approximately 10-20% of important prostate cancers

**Acceptability of Prostate MRI:**

**Patient Questionnaire**

*(Adapted from: Schönenberger et al. 2007, with kind permission of Professor Marc Dewey)*

---

Please give your answers based on your own knowledge and having read the patient information sheet.

---

1. How satisfied are you with the ability of prostate biopsy alone to help detect prostate cancer?

Very poor ☐      Poor ☐      Barely Acceptable ☐      Good ☐      Very good ☐

2. How satisfied are you with the ability of MRI scans to help detect prostate cancer?

Very poor ☐      Poor ☐      Barely Acceptable ☐      Good ☐      Very good ☐

---

3. Please rate your degree of concern that your MRI scan might miss important prostate cancer:

No concern ☐      Little ☐      Moderate ☐      Intense ☐      Very intense ☐

If you are concerned, why are you concerned? .....

---

4. If your MRI scan showed low suspicion of prostate cancer, would you be happy to not have a prostate biopsy?

No ☐      Yes ☐      Don't know ☐

5. If your MRI scan showed low suspicion of prostate cancer, would you want to have a biopsy anyway?

No ☐      Yes ☐      Don't know ☐

---

6. If you were diagnosed with prostate cancer, which aspect of the disease do you think would be most important to you? (For example: life expectancy, quality of life, spread of cancer around the body, urine/sexual symptoms)

7. Are there any additional comments that you would like to make?

If you would be willing have a short interview on this topic, then please leave your contact details below:

Phone number:

Email address:

Postal address:

**Acceptability of Prostate MRI:**

**Patient Consent Form 2 (Interview)**

*Please initial box*

1. I confirm that I have read and understood the information sheet dated ..... (version ..... ) for the above interview study. I have had the opportunity to consider the information, ask questions and had these answered satisfactorily.

☐

2. I understand that my participation is voluntary and that I am free to withdraw at any time without giving any reason, without my medical care or legal rights being affected.

☐

3. I agree to my GP being informed of my participation in the study.

☐

4. I agree to take part in the above study.

☐

Name of participant:

Date:

Signature:

Name of person taking consent:

Date:

Signature:
